# Supplementary material
Source: PubMed Central journal article supplement (PMC7700721)

# Supporting Information

## Unraveling Reversible DNA Cross-links with a Biological Machine

Shane R. Byrne & Steven E. Rokita\*

Chemistry Biology Interface Graduate Program and Department of Chemistry

Johns Hopkins University, 3400 N. Charles St.

Baltimore, MD 21218 United States

|                                                                                                                                                                        |     |
|------------------------------------------------------------------------------------------------------------------------------------------------------------------------|-----|
| <b>Supplemental experimental section</b>                                                                                                                               | S2  |
| <b>Figure S1.</b> Unwinding a model replication fork with T7gp4.                                                                                                       | S2  |
| <b>Figure S2.</b> Distribution of adducts formed by bisQMP after T7gp4 treatment.                                                                                      | S3  |
| <b>Figure S3.</b> Unwinding DNA and release of a reversible interstrand cross-link.                                                                                    | S3  |
| <b>Figure S4.</b> Unwinding a model replication fork in the presence of 9-aminoacridine.                                                                               | S4  |
| <b>Figure S5.</b> Unwinding DNA and release of a reversible interstrand cross-link from a second model of a replication fork.                                          | S5  |
| <b>Figure S6.</b> Monitoring unwinding of DNA and release of a reversible interstrand cross-link when the translocated strand is radiolabeled.                         | S5  |
| <b>Figure S7.</b> Representative data for Figure 2, supplementing conditions after initial unwinding of DNA containing a reversible interstrand cross-link.            | S6  |
| <b>Figure S8.</b> Unwinding DNA containing a reversible interstrand cross-link with excess T7gp4 for an extended incubation and further supplements of dTTP and T7gp4. | S6  |
| <b>Figure S9.</b> Representative data for Figure 3, challenging T7gp4 with an irreversible cross-link.                                                                 | S7  |
| <b>Figure S10.</b> Dissociation of T7gp4 from duplex DNA containing a reversible cross-link.                                                                           | S7  |
| <b>Figure S11.</b> Unwinding DNA and release of nucleobase adducts from the excluded strand.                                                                           | S8  |
| <b>Figure S12.</b> Release of a reversible cross-link by T7gp4 during unwinding of the excluded strand.                                                                | S8  |
| <b>Figure S13.</b> Dissociation versus deglycosylation of guanine N7 adducts.                                                                                          | S9  |
| <b>References</b>                                                                                                                                                      | S10 |



**Figure S2** Distribution of adducts formed by bisQMP after T7gp4 treatment. OD1:5'-[<sup>32</sup>P]-OD2 was cross-linked and purified by standard conditions except the bisQMP concentration was lowered to 50 μM and reaction time was limited to 30 min for single-hit conditions. (A) The resulting mixture of OD1:5'-[<sup>32</sup>P]-OD2 (10 nM) with and without cross-linking in 40 mM Tris-HCl pH 7.5, 10 mM MgCl<sub>2</sub>, 50 mM potassium glutamate and 1 mM dTTP was incubated in the alternate absence and presence of T7gp4 (55 nM monomer) for the indicated time at 37 °C. Reaction was quenched with EDTA (40 mM), lyophilized and then dissolved in 10% piperidine (30 μL). The resulting solution was heated for 30 min at 90 °C and lyophilized again. To remove residual piperidine, samples were dissolved in water and lyophilized in three consecutive repetitions. (B) Products were separated by denaturing PAGE (PAGE, 20%). As electrophoretic standards, lane ss contains 5'-[<sup>32</sup>P]-OD2 after piperidine treatment. Lane A+G contains 5'-[<sup>32</sup>P]-OD2 after incubation with 5% formic acid (30 min, 37 °C) and subsequent piperidine treatment. Lane xl was generated by piperidine treatment of OD1:5'-[<sup>32</sup>P]-OD2 after incubation with bisQMP as described above.

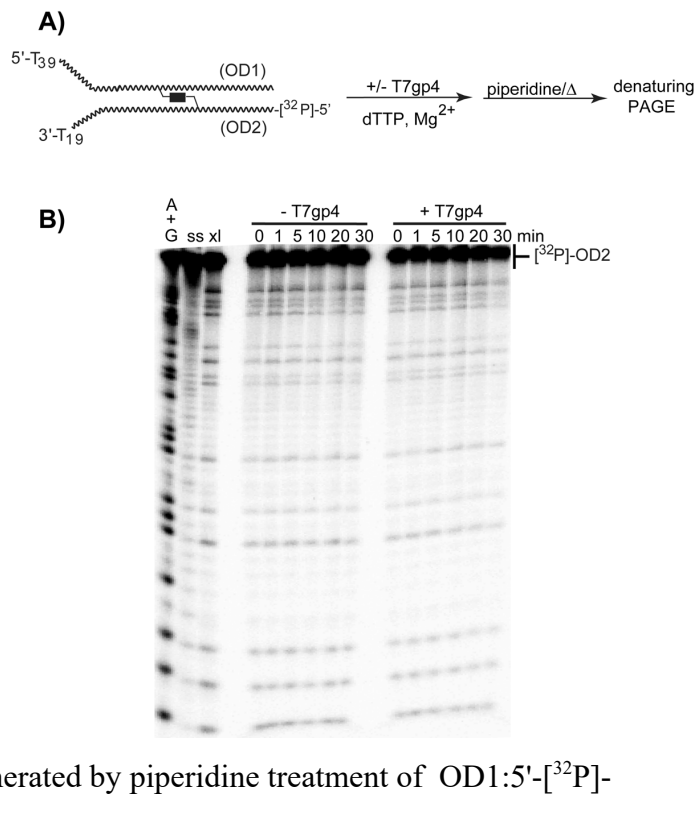

**Figure S3.** Unwinding DNA and release of a reversible interstrand cross-link. (A) A replication fork model (OD1:5'-[<sup>32</sup>P]-OD2, 10 nM) containing an interstrand cross-link formed by bisQMP and a radiolabel on the excluded strand was incubated in 40 mM Tris-HCl pH 7.5, 10 mM MgCl<sub>2</sub> and 50 mM potassium glutamate with the alternative and combined presence of T7gp4 (55 nM monomer) and dTTP (1 mM). (B) After incubation at 37 °C for the indicated time, reaction was quenched by addition of EDTA (40 mM) and analyzed by denaturing polyacrylamide gel electrophoresis (PAGE, 10%). As electrophoretic standards, lane ss contains only 5'-[<sup>32</sup>P]-OD2 and lane xl contains OD1:5'-[<sup>32</sup>P]-OD2 cross-linked by bisQMP. (C) The remaining cross-link (% based on total radiolabel) was determined by phosphoimager in three replicates and their average values are indicated by the cross-bars.

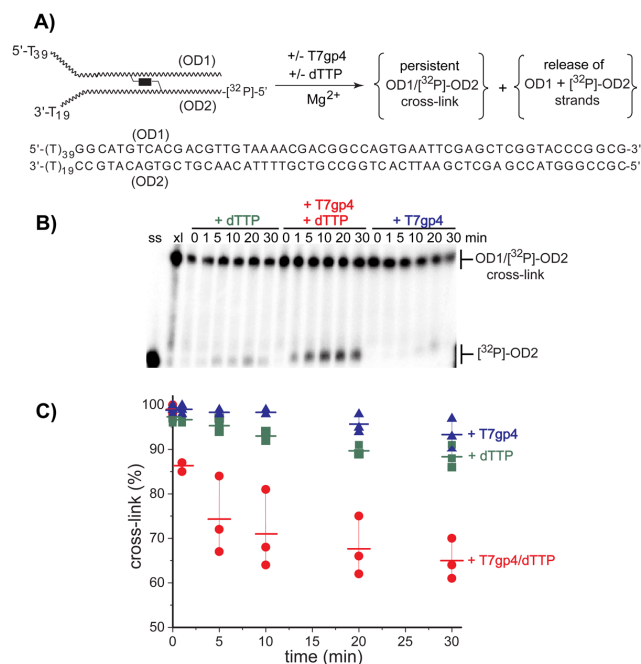

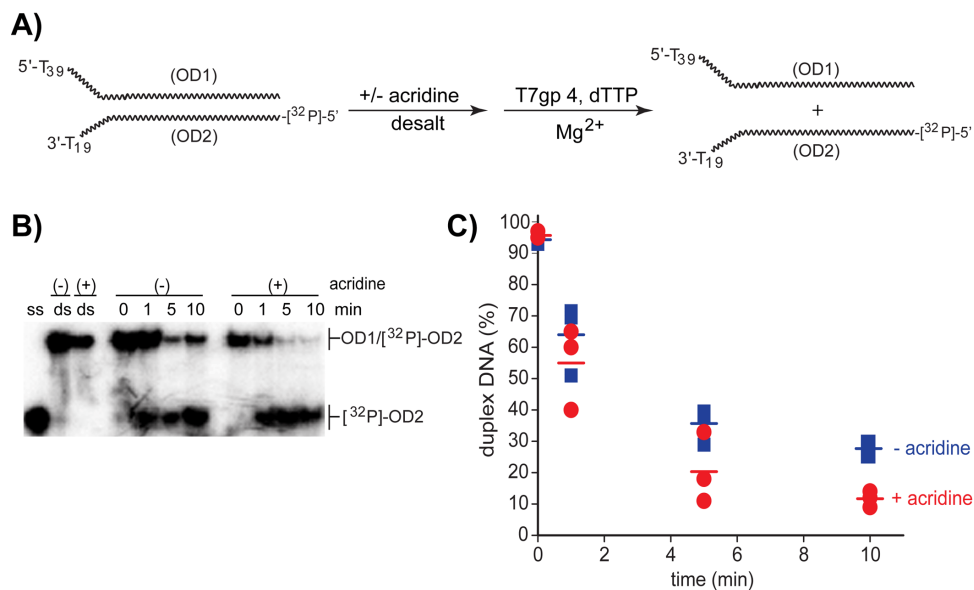

**Figure S4.** Unwinding a model replication fork in the presence of 9-aminoacridine. (A) OD1:5'-[<sup>32</sup>P]-OD2 (10 nM) containing a radiolabel on the excluded strand in 40 mM Tris-HCl pH 7.5, 10 mM MgCl<sub>2</sub>, 50 mM potassium glutamate and 1 mM dTTP was incubated with T7gp4 (55 nM monomer) for the indicated time at 37 °C. Alternatively, OD1:5'-[<sup>32</sup>P]-OD2 in 10 mM 2-(N-morpholino)ethanesulfonate (MES) pH 7 and 50 mM NaF was incubated for 2 h with 250 μM 9-aminoacridine under ambient conditions. Low molecular weight species were then removed using a P6 micro-spin column. The isolated DNA was treated with T7gp4 under conditions described above. Unwinding was quenched with EDTA (40 mM) and loading dye containing bromophenol blue and xylene cyanol in 30% glycerol. (B) Products were separated by native polyacrylamide gel electrophoresis (PAGE, 10%) and quantified by phosphorimagery (% relative to total radiolabel). As electrophoretic standards, lane ss contains only 5'-[<sup>32</sup>P]-OD2. Lanes ds contain the annealed duplex OD1:5'-[<sup>32</sup>P]-OD2 in the presence and absence of 9-aminoacridine as indicated. (C) The remaining duplex (% based on total radiolabel) was determined by phosphoimagery in three replicates and their average values are indicated by the cross-bars.

**Figure S5.** Unwinding DNA and release of a reversible interstrand cross-link from a second model of a replication fork. (A) OD3:5'-[<sup>32</sup>P]-OD4 (10 nM) containing an interstrand cross-link formed by bisQMP and a radiolabel on the excluded strand was incubated in 40 mM Tris-HCl pH 7.5, 10 mM MgCl<sub>2</sub> and 50 mM potassium glutamate with the alternative and combined presence of T7gp4 (55 nM monomer) and dTTP (1 mM). (B) After incubation at 37 °C for the indicated time, reaction was quenched by addition of EDTA (40 mM) and analyzed by denaturing polyacrylamide gel electrophoresis (PAGE, 10%). As electrophoretic standards, lane ss contains only 5'-[<sup>32</sup>P]-OD4 and lane xl contains OD3:5'-[<sup>32</sup>P]-OD4 cross-linked by bisQMP. (C) The remaining cross-link (% based on total radiolabel) was determined by phosphoimager in three replicates and their average values are indicated by the cross-bars.

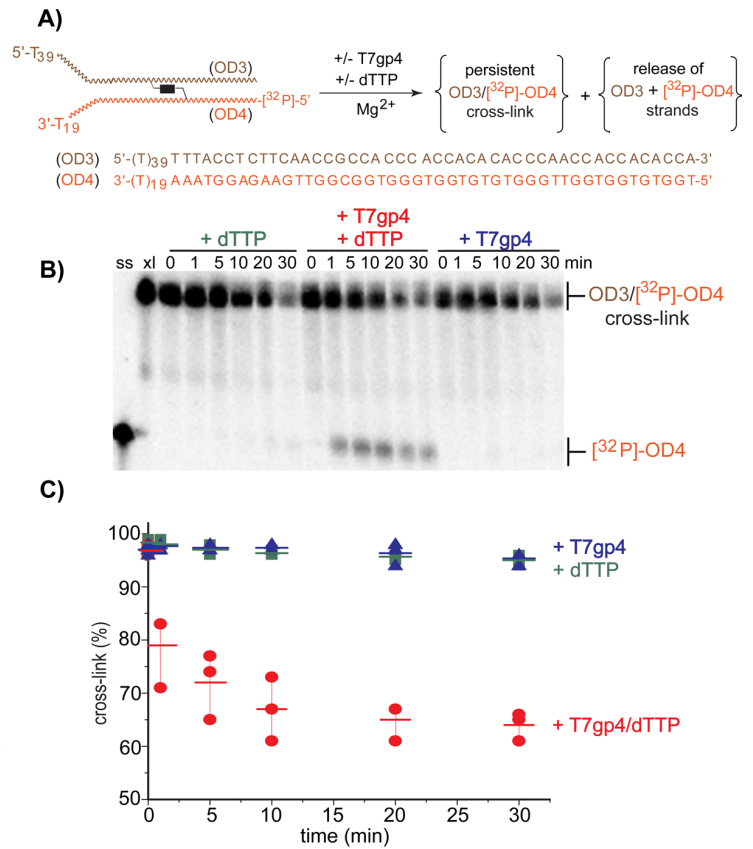

**Figure S6.** Monitoring unwinding of DNA and release of a reversible interstrand cross-link when the translocated strand is radiolabeled. (A) 5'-[<sup>32</sup>P]-OD3:OD4 (10 nM) containing an interstrand cross-link formed by bisQMP was incubated in 40 mM Tris-HCl pH 7.5, 10 mM MgCl<sub>2</sub> and 50 mM potassium glutamate with the alternative and combined presence of T7gp4 (55 nM monomer) and dTTP (1 mM). (B) After incubation at 37 °C for the indicated time, reaction was quenched by addition of EDTA (40 mM) and analyzed by denaturing polyacrylamide gel electrophoresis (PAGE, 10%). As electrophoretic standards, lane ss contains only 5'-[<sup>32</sup>P]-OD3 and lane xl contains 5'-[<sup>32</sup>P]-OD3:OD4 cross-linked by bisQMP. (C) The remaining cross-link (% based on total radiolabel) was determined by phosphoimager in three replicates and their average values are indicated by the cross-bars.

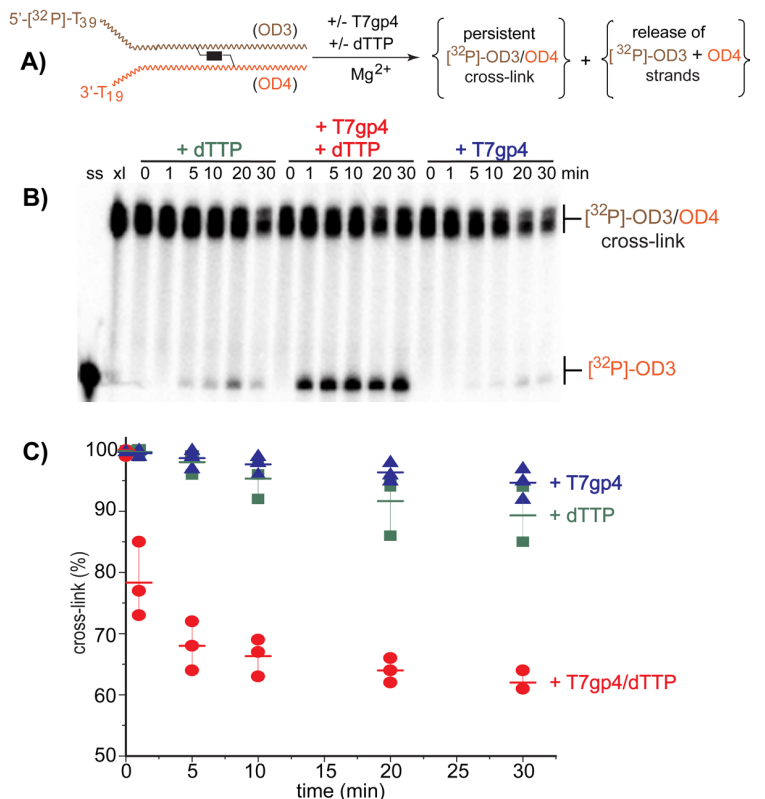

**Figure S7.** Representative data for Figure 2, supplementing conditions after initial unwinding of DNA containing a reversible interstrand cross-link. (A) OD3:5'-[<sup>32</sup>P]-OD4 (10 nM) containing a cross-link formed by bisQMP and a radiolabel on the excluded strand was incubated at 37 °C in 40 mM Tris-HCl pH 7.5, 10 mM MgCl<sub>2</sub> and 50 mM potassium glutamate with T7gp4 (55 nM monomer) and dTTP (1 mM) for 30 min before supplementing with an additional aliquot of either T7gp4 (55 nM monomer) or dTTP (1 mM). Incubations were continued at 37 °C for the indicated times and then quenched with EDTA (40 mM). (B) Reaction products were identified after separation by denaturing PAGE (10%). The control entitled spontaneous hydrolysis contained no T7gp4 or dTTP throughout the incubations and that entitled no supplement contained the standard concentrations of T7gp4 and dTTP in the initial incubation but no additional T7gp4 or dTTP in the subsequent incubation.

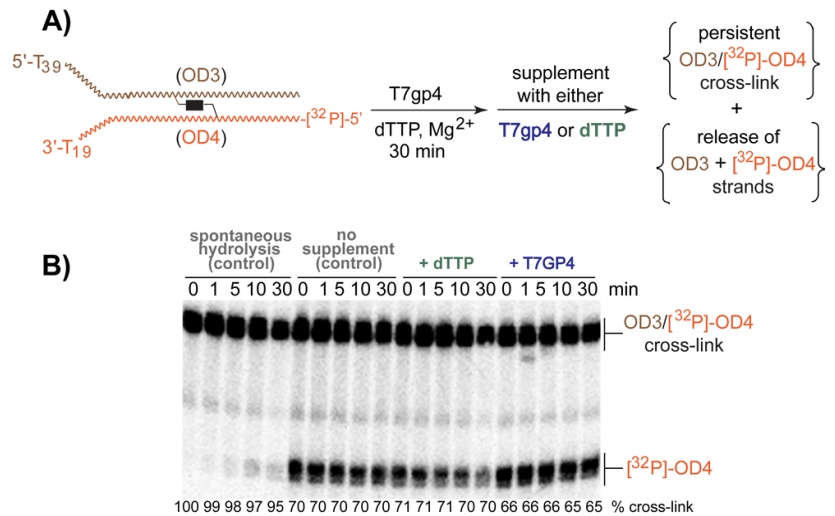

**Figure S8.** Unwinding DNA containing a reversible interstrand cross-link with excess T7gp4 for an extended incubation and further supplements of dTTP and T7gp4. (A) OD3:5'-[<sup>32</sup>P]-OD4 (10 nM) containing a cross-link formed by bisQMP and a radiolabel on the excluded strand was incubated at 37 °C in 40 mM Tris-HCl pH 7.5, 10 mM MgCl<sub>2</sub> and 50 mM potassium glutamate with excess T7gp4 (500 nM monomer) and dTTP (1 mM) for 0 - 30 min. After 30 min, equivalent samples were then supplemented with an additional aliquot of only dTTP (1 mM) or both T7gp4 (500 nM monomer) and dTTP (1 mM). These latter samples were incubated at 37 °C for an additional 30 min (60 min total) before quenching with EDTA (40 mM). (B) Reaction products were identified after separation by denaturing PAGE (10%).

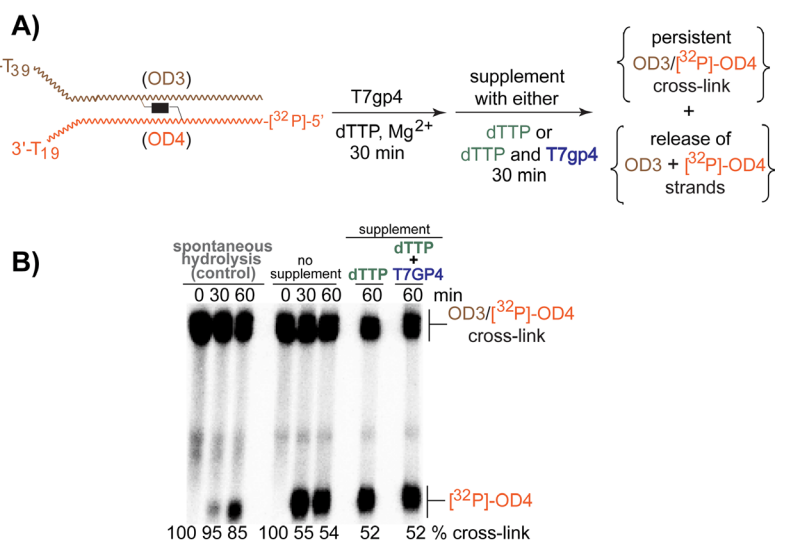



**Figure S11.** Unwinding DNA and release of nucleobase adducts from the excluded strand. (A) A model replication fork (OD3:5'-[<sup>32</sup>P]-OD4, 10 nM) containing reversible adducts formed by monoQMP was incubated in the alternative and combined presence of T7gp4 (55 nM monomer) and dTTP (1 mM). (B) After incubation at 37 °C for the indicated time, reaction was quenched by addition of EDTA (40 mM) and analyzed by denaturing PAGE (10%). As electrophoretic standards, lane ss contains only 5'-[<sup>32</sup>P]-OD4 and lane alk contains OD4 after treatment with monoQMP. (C) The remaining cross-link (% based on total radiolabel) was measured by phosphoimager in three replicates and their average values are indicated by the cross-bars. The low resolution of this gel relative to that of Figure 4 may be attributed to the high guanine content of OD4.

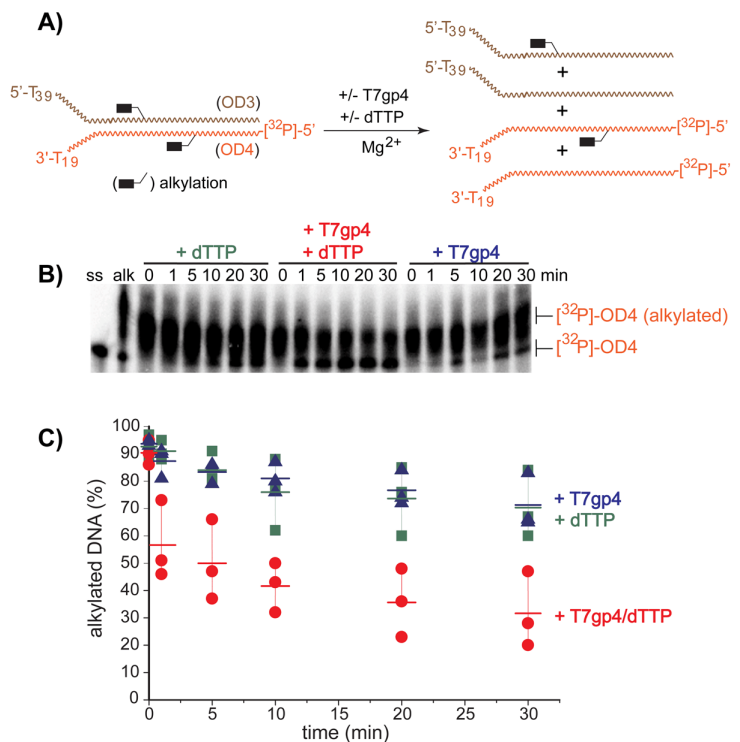

**Figure S12.** Release of a reversible cross-link by T7gp4 during unwinding of the excluded strand. (A) The duplex OD3:5'-[<sup>32</sup>P]-OD4 (10 nM) containing reversible cross-links formed by bisQMP was incubated in the alternative and combined presence of T7gp4 (55 nM monomer) and dTTP (1 mM). (B) After incubation at 37 °C for the indicated time, reaction was quenched by addition of EDTA (40 mM) and analyzed by denaturing PAGE (10%). As electrophoretic standards, lane ss contains only 5'-[<sup>32</sup>P]-OD4. Lane alk contains OD4 after treatment with monoQMP and lane xl contains OD3:5'-[<sup>32</sup>P]-OD4 cross-linked by bisQMP.

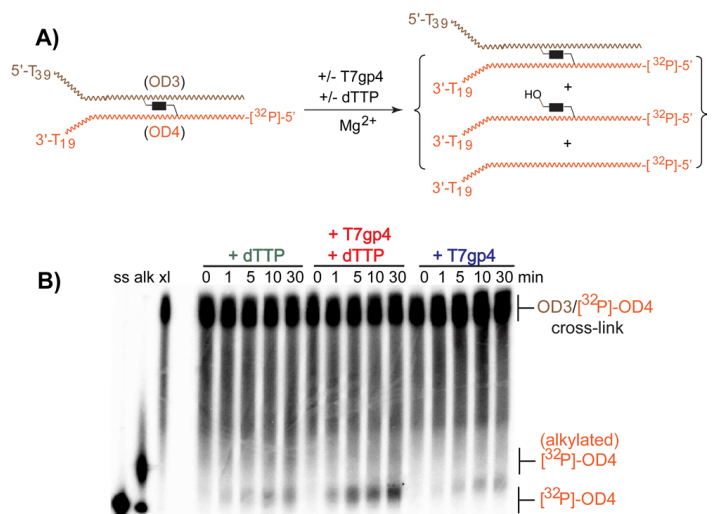

Supplement: NIHMS1646317-supplement-supporting_material.pdf [file NIHMS1646317-supplement-supporting_material.pdf]
